# Supplementary material
Source: MDPI journal article supplement (https://www.mdpi.com/1999-4907/8/7/229)
Supplement: s1 [file s1]

Supplementary 1

Forest and management conditions of each location.

| Location |  | Forest condition | Management condition |
| --- | --- | --- | --- |
| Kutai | 3 | Natural Forest | “Conservation Forest”: as Kutai National Park |
| Berau | 6 | Natural Forest | Belonging to Forest Concession Company |
| Bukit Soeharto | 6 | Natural Forest | “Conservation Forest”: as Research and Educational Forest of Mulawarman University |
| Kintap | 2 | Natural/Secondary Forest | Kintap Forest affected by human impact (illegal logging) |
| Busang | 3 | Natural Forest | Belonging to Forest Concession Company |
| Kapuas Hulu | 2 | Secondary Forest | Seriang Village Forest |
| Gunung Palung | 3 | Natural Forest | “Conservation Forest”: as National park since 1990 |
| Musi Rawas | 3 | Natural Forest | Muara Kelingi Forest conserved by local people |
| Jambi | 1 | Natural/Secondary Forest | “Conservation Forest”: as National Park Bukit 12 |

All base arrangements of “Haplotype B” for six chloroplast DNA region that we used in this study.

Ez_Cp_01

ATTACCCCCTTTCTTATCGGGATCGGACTAACAAGAATGGTTGGGACAACAAACATCCATCTCGTTTGTACTTTGGATACCCGTATAACCATCGAAGGTCGTTGAAGTGACTAATTCCTGGAAACAGGGGCGTTGAGGACAAAGAAATTGTTGGAGTTACCATTTCTATCTAGCACCAACACGCTTAGTGTTAAGAAAAGACAGACCTCTTGCAGGAAGGATGGCTAGAGATTTCTTGTAAAAACACCAGCCCCTGTCAGTTCATAATGAGAATATTTCAATCTTTTTTGATTCCATTGATTATTCCCCTTATTACTATGCACAGAAGGGAGGAGCCGTATGAGGTGAAAATCTCACGTACGGTTCTGGAACGGAGATTCTTTGAATAGAATGAACGACCGTAACGGATGTCAGCTCAATCCGAAGGAAATTATGCGGAAGCTTTACAAAATTATTATGAAGCTACGCGACCAGAAATTGATCCCTATGATCGAAGTTATATACTCTATAACATAGGCCTTATCCACACA

Ez_Cp_05

CTACTACTTTACTACCTAACCATTTATCCATCCTCTTTATTTCGTCATCGGTTCCAAATTAGTTATGTTTCTTATTCAGTCTACTCTTTCACAAACGGATCCGGACAAAAACTTTTCTCTCTTATCACAAGTCGTATTATAGATACGATATACTTACAAATGAACATATATAGGCAAGGCATTTTCATTATTAAATCATTCACAGTTCATATCATTACTCTTACACTGACAAAGTCTTCTTTTTGAAGATCCAAGAAATTCCAGGACCTAGGTAAGATTTTGTAAGACCTTTTGAGTCCCTTTAATTGACACAGACTCAAGTCCTCTAATAGGATGATGCGTCCGGAATGGTCGGGATAGCTCAGCTGGTAGAGCAGAGGACTGAAAATCCTCGTGTCACCAGTTCAAATCTGGTTCCTGACAGTGGTTAATGTATCGAATGGATACTCATCCAAATGAATCGATATGGATATCGGGATCCGTATTCGTTAAGTTAATAATCTAGACCGGGATACATACTTATCCGTCTATATATATATAGACCCCCATTTTTGTAGATGGGTAAAGAGTCTATGGGTAAAGAAAAGAATTAGATTCTCTTCCCTCTTCTTTTTTTTTACTGTACCTTCCCTCGCTCAAAAAGAATGT

Ez_Cp_07

TCTACCCTTCTCTGCATCATTTACTAAAATGGTGATCTCATTATTGCCTATTCTAGCGAAACCGCCCATCACAGCCATCGTTAACCATTGGTCGTTGAGGCGTATTCTCAAAATACCTATATCTACGGCTGTGGCAATAGGGGCGTGGTTTGGTAATACGCCAATTTGGCCACTATTAGTAGATAAAATGATTTCTTTCACTTCTGAATCCCAAATAATTCGATTAGGAGTCAGTACACAAAGATTTAAGGTCATTTCTTCAATTTGCTCTCCACTTCTAAGTTCATAGCCTTCGCAGTAGCTTCATCGATATTACCTACCAAATAAAAGGCCTGCTCGGGAAGACCATCTAATTCTCCGGAAAGGATCAGTTGAAACCCCCTAATTGTTTCTGCAAGACCAACATATTTCCCTGGAGAACCAGTAAATACTTCTGCTACGAAGAAGGGTTGTGATAAGAAACGCTCAATTTTTCGTGCTCTTGCTACGG

Ez_Cp_09

CTATTCTATCTAATTATTTTCATAAATAGTTTTCATCAATAAAAACAAGATATAAAGTCAAAGAATCCTGTGATTTAAAAAATCGTTCACTGTACAATGCGATGAAAGAAAAAAGAATGAAGTGAATTGTAATCAGATATATCTGGAGTTTTTGAGAACCATTTGAATCACTACTTGATTCAAATGGTTCTCAAAAACTTGCACAAACTTTTTCTTCGGGCCTTTTCTTCAATTAGATGTTAATGTGAATGAACCATAACTATGTAGTCCTATTCCTAATAGATTGACTCCAAAATAGCATGTCCAAATTATAAGAAATCCGATAGAAGCCACAATTGCCGAATCCACACCCTGAAAGCTCTGATTTTTTCTACTATGTAAATAAATAGCGAATAGGGTCCAAGTAATAAATGCCCAAGTTTCCTTGGGGTCCCAATTCCAATAAGACCCCCATGCTTCGTTAGCCC

Ez_Cp_11

CCTTGTTTCAAGAGGGGAGAACGGGTTATTCACATTTCATTTGATGGTCAGAGGCGAATTGAAAGCTAAGCAGTGGTAATTCGAAAAATTCCCCGGGGTAAAAATAGAGATGTCTCCTACGTTACCCGTAATATGTAGAAGTATCGACGTAATTTCATAGAGTCATTCGGTCTGAATGCTACATGAAGAACATAAGCCAGATGACGAAACGGAGAGATCTAGGATGTATAAGATCATAACATGAGTGATTTGGCAGATTTGGATTCCTATATATCCACGTTTTTGTGGCATTTTATTTCATCATACGATTCATATAAGATCCATCTATCTAGATATCATCATATACATCCAGAAAGCCGTATGTTTTGGAAGAAGCTTGTACGGTTTGGGAAGGGATTTTTATTGATCAAAAAGAGAAATCTACTTCAACCGATATGCCCTTAGGCACGGCCATACATAACATAGAAATTACACTGGAAAAGGTGGACAATAGCTAGAGCAGCAG

Ez_Cp_12

AAGATGAGTCCCCCTTGAAGCCAGAATGGATTTTCCTTCATATCTGACATAATGCATGAAAGGGTCTTTGAACAACCATAGGGTCTTCTGAAAATCGTTACAAAGCACTACTACAAGATGTTCTATTTTTCCATAGAAATGTGTTCGCTCAAGAAAGGATCCAAAAGATGTTGATCGTAAATGAAAGGATTGTTTACGGAGAAAAATGAATATGGATTCATATTCGTATACATGAGAATTAGATAGGAACAAGAATAATCTTTGATTCTCTTTTGAAAAGGTGAAAATGGATTTTTTTTTAGTAATGAGACTATTTGAATTCCAATACTCGTAGAGAGAGAATCGAAATAAATGCAATGAGGGAGCATCTTGTACCCAAGAGTGAAGAATTTGAACCAAGATTTCCAGATGAATGGGGTGGGGTATTAGTATATCTGACACATGATTTAAATGTGATAATTTGTCCTCGAAAAAGGGAAATATTGAATGAATAGATC
